# Supplementary material for: Modeling the influence of temperature and water potential on seed germination of Allium tenuissimum L
Source: PeerJ. 2020 Apr 7;8:e8866. doi: 10.7717/peerj.8866 (PMC7147430; doi:10.7717/peerj.8866)
Supplement: Data S1 [file peerj-08-8866-s001.xlsx]

## Sheet: 28 ℃
Seed germination number at 28 ℃ under four water potential levels
Water potential	Duration of germination (d)																													Sum
	1	2	3	4	5	6	7	8	9	10	11	12	13	14	15	16	17	18	19	20	21	22	23	24	25	26	27	28	29
0 MP	0	0	0	4	4	14	6	4	0	8	2	4	6	0	0	2	2	0	0	0	0	0	0	0	0	0	0	0	0	56
	0	0	0	2	8	4	4	8	4	0	14	2	0	0	0	2	4	0	0	0	0	0	0	0	0	0	0	0	0	52
	0	0	0	0	6	10	0	2	0	0	2	0	8	2	4	4	0	0	0	0	0	0	0	0	0	0	0	0	0	38
	0	0	0	2	22	6	2	0	0	4	4	4	6	0	0	0	0	0	0	0	0	0	0	0	0	0	0	0	0	50
-0.2 MP	0	0	0	0	0	10	8	2	0	0	0	0	4	0	0	0	0	0	0	0	0	0	0	0	0	0	0	0	0	24
	0	0	0	0	2	4	8	2	0	0	0	4	8	0	0	0	0	0	0	0	0	0	0	0	0	0	0	0	0	28
	0	0	0	2	2	0	6	0	2	4	0	2	0	0	0	0	0	0	0	0	0	0	0	0	0	0	0	0	0	18
	0	0	0	0	0	2	6	6	0	0	2	0	8	2	0	0	4	0	0	0	0	0	0	0	0	0	0	0	0	30
-0.4 MP	0	0	0	0	6	2	0	0	0	0	2	4	10	0	6	0	0	0	0	0	0	0	0	0	0	0	0	0	0	30
	0	0	0	0	0	0	4	2	0	0	0	0	6	6	0	0	0	0	0	0	0	0	0	0	0	0	0	0	0	18
	0	0	0	0	0	0	2	4	0	0	0	2	6	0	0	0	2	0	0	0	0	0	0	0	0	0	0	0	0	16
	0	0	0	0	2	0	0	0	0	0	2	0	6	2	0	0	0	0	0	0	0	0	0	0	0	0	0	0	0	12
-0.6 MP	0	0	0	0	0	0	0	0	0	0	0	0	2	0	0	0	2	0	0	0	0	0	0	0	0	0	0	0	0	4
	0	0	0	0	0	0	0	2	2	0	0	0	0	0	0	0	0	0	0	0	0	0	0	0	0	0	0	0	0	4
	0	0	0	0	0	0	0	4	0	0	0	0	0	0	0	0	0	0	0	0	0	0	0	0	0	0	0	0	0	4
	0	0	0	0	0	2	0	0	4	0	0	0	2	0	0	2	0	0	0	0	0	0	0	0	0	0	0	0	0	10

## Sheet: 24 ℃
Seed germination number at 24 ℃ under four water potential levels
Water potential	Duration of germination (d)																													Sum
	1	2	3	4	5	6	7	8	9	10	11	12	13	14	15	16	17	18	19	20	21	22	23	24	25	26	27	28	29
0 MP	0	0	2	16	16	2	10	16	0	2	4	0	2	0	4	0	0	0	0	0	0	0	0	0	0	0	0	0	0	74
	0	0	0	18	24	6	10	10	2	4	2	4	0	0	4	0	0	0	0	0	0	0	0	0	0	0	0	0	0	84
	0	0	2	14	34	10	4	2	0	4	4	0	2	2	0	2	0	0	0	0	0	0	0	0	0	0	0	0	0	80
	0	0	4	16	18	8	10	2	4	4	6	0	2	0	6	0	0	0	0	0	0	0	0	0	0	0	0	0	0	80
-0.2 MP	0	0	0	0	16	12	2	8	2	8	8	4	2	2	0	2	0	0	0	4	0	0	0	0	0	0	0	0	0	70
	0	0	0	0	16	10	2	2	2	8	6	4	8	0	0	0	0	2	2	0	0	0	0	0	0	0	0	0	0	62
	0	0	0	2	8	12	6	8	4	14	8	0	2	0	0	0	0	2	0	2	0	0	4	0	0	0	0	0	0	72
	0	0	0	0	20	12	6	8	2	4	2	6	0	4	0	2	0	0	2	2	0	0	0	0	0	0	0	0	0	70
-0.4 MP	0	0	0	0	0	0	6	4	2	8	16	2	8	0	2	8	0	2	0	0	0	0	0	0	0	0	0	0	0	58
	0	0	0	0	0	0	2	2	2	8	14	4	2	0	8	6	0	0	2	6	0	0	0	0	0	0	2	0	0	58
	0	0	0	0	6	0	6	2	0	10	12	2	0	0	10	4	0	0	0	6	0	0	2	0	0	0	0	0	0	60
	0	0	0	0	0	0	4	0	0	10	14	4	6	2	6	2	0	0	0	4	2	0	0	2	0	2	0	0	0	58
-0.6 MP	0	0	0	0	0	0	0	0	0	0	2	0	0	0	6	6	2	0	0	4	4	0	0	0	0	0	0	0	0	24
	0	0	0	0	0	0	0	0	0	0	0	0	2	0	4	2	0	2	2	4	0	0	0	4	0	0	6	0	0	26
	0	0	0	0	0	0	0	0	0	0	0	0	0	2	0	0	2	0	0	2	2	4	4	4	2	0	0	0	0	22
	0	0	0	0	0	0	0	0	0	0	4	0	0	0	2	6	2	0	0	2	4	0	0	0	0	0	2	0	0	22

## Sheet: 20 ℃
Seed germination number at 20 ℃ under four water potential levels
Water potential	Duration of germination (d)																													Sum
	1	2	3	4	5	6	7	8	9	10	11	12	13	14	15	16	17	18	19	20	21	22	23	24	25	26	27	28	29
0 MP	0	0	0	12	26	20	16	6	6	4	2	0	0	2	2	0	2	0	0	0	0	0	0	0	0	0	0	0	0	98
	0	0	0	16	26	22	6	8	6	0	2	4	0	2	0	0	2	0	0	0	0	0	0	2	0	0	0	0	0	96
	0	0	0	12	30	20	4	6	4	4	0	4	2	2	2	0	0	0	0	0	0	2	0	0	0	0	0	0	0	92
	0	0	1	8	30	26	10	4	4	0	4	0	0	2	0	0	0	2	2	0	0	0	0	0	0	0	0	0	0	93
-0.2 MP	0	0	0	0	14	16	24	4	10	4	0	6	0	2	2	0	0	2	0	0	0	0	0	0	2	2	4	0	0	92
	0	0	0	2	18	22	12	10	6	6	4	4	2	0	0	0	0	0	2	0	2	0	0	0	2	0	0	0	0	92
	0	0	0	0	14	20	14	12	14	4	0	6	4	0	0	0	0	0	0	0	0	0	0	2	0	0	0	0	0	90
	0	0	0	4	18	16	8	8	16	2	4	4	0	0	2	0	2	0	0	2	4	2	4	2	0	0	0	0	0	98
-0.4 MP	0	0	0	0	0	0	16	6	10	10	2	10	10	2	2	0	10	2	2	0	0	2	2	0	0	2	0	0	4	92
	0	0	0	0	2	8	6	6	16	8	2	4	4	2	0	2	2	6	0	2	2	0	2	2	2	2	0	0	0	80
	0	0	0	0	0	2	14	4	14	8	4	6	2	0	6	2	12	4	0	2	2	0	2	2	0	0	0	0	0	86
	0	0	0	0	0	2	0	6	6	4	0	6	6	8	12	6	0	6	2	0	4	0	2	2	2	2	2	0	0	78
-0.6 MP	0	0	0	0	0	0	2	2	0	8	8	0	2	2	2	4	6	2	0	6	0	4	0	0	4	0	2	0	2	56
	0	0	0	0	0	0	0	0	0	0	0	0	2	8	10	6	2	6	4	6	4	2	6	4	6	2	0	0	0	68
	0	0	0	0	0	0	0	0	0	0	2	0	0	0	0	0	2	2	0	0	16	6	4	0	8	2	0	0	0	42
	0	0	0	0	0	0	0	0	0	0	0	0	2	2	6	2	10	4	2	8	2	2	0	0	6	4	4	0	0	54

## Sheet: 15 ℃
Seed germination number at 15 ℃ under four water potential levels
Water potential	Duration of germination (d)																													Sum
	1	2	3	4	5	6	7	8	9	10	11	12	13	14	15	16	17	18	19	20	21	22	23	24	25	26	27	28	29
0 MP	0	0	0	4	6	6	12	6	0	2	2	6	4	2	0	0	10	18	4	2	0	0	0	0	0	2	4	0	0	84
	0	0	0	0	0	2	12	4	8	4	4	2	10	0	0	0	26	22	4	0	2	0	0	0	0	0	0	0	0	100
	0	0	0	0	2	14	10	10	4	2	8	0	0	0	4	0	18	18	4	0	0	0	0	0	0	0	2	0	0	94
	0	0	0	0	2	6	6	6	8	2	2	2	4	2	4	0	12	18	4	2	2	0	0	0	0	0	0	0	0	82
-0.2 MP	0	0	0	0	0	0	14	10	12	4	2	0	0	0	2	0	28	10	4	2	4	0	0	0	4	0	0	0	0	96
	0	0	0	0	0	4	18	8	4	0	2	2	0	0	0	2	16	16	0	2	4	0	0	2	6	2	0	0	0	86
	0	0	0	0	0	0	20	12	4	0	4	2	2	0	4	2	16	12	0	0	2	2	0	0	0	2	0	0	0	82
	0	0	0	0	0	2	20	8	4	2	8	2	2	4	0	0	18	14	2	0	0	2	2	0	2	6	4	0	0	92
-0.4 MP	0	0	0	0	0	0	8	10	8	8	6	4	6	0	4	2	12	6	2	2	2	4	0	0	0	0	4	2	0	84
	0	0	0	0	0	0	2	8	12	8	8	4	4	6	6	2	2	0	6	0	0	2	0	4	0	8	10	0	2	74
	0	0	0	0	0	0	2	6	10	8	6	2	6	8	8	2	6	2	0	4	0	0	6	0	0	6	0	0	0	76
	0	0	0	0	0	0	4	12	12	10	2	4	6	2	6	2	0	0	2	2	2	0	2	0	0	6	0	0	0	68
-0.6 MP	0	0	0	0	0	0	0	0	4	2	0	0	2	0	2	0	0	0	4	2	2	2	2	0	2	8	14	0	6	24
	0	0	0	0	0	0	0	0	0	2	2	0	2	6	4	0	0	0	2	4	4	0	2	4	2	6	10	6	2	34
	0	0	0	0	0	0	0	0	0	0	4	0	2	4	2	6	0	0	4	0	0	2	0	0	0	10	10	10	6	24
	0	0	0	0	0	0	0	0	0	0	0	4	6	2	4	2	0	0	6	0	4	4	2	0	0	6	16	6	0	34

## Sheet: 11 ℃
Seed germination number at 11 ℃ under four water potential levels
Water potential	Duration of germination (d)																													Sum
	1	2	3	4	5	6	7	8	9	10	11	12	13	14	15	16	17	18	19	20	21	22	23	24	25	26	27	28	29
0 MP	0	0	0	0	0	0	0	0	4	2	14	16	8	8	6	2	2	0	4	0	4	0	2	0	0	0	0	0	0	72
	0	0	0	0	0	0	0	0	6	4	8	12	8	4	4	0	2	0	4	4	6	4	0	0	0	2	0	0	0	68
	0	0	0	0	0	0	0	0	2	4	8	4	14	10	4	2	4	2	4	6	6	2	2	0	0	0	0	0	0	74
	0	0	0	0	0	0	0	2	0	2	10	20	6	2	4	6	6	2	4	0	2	2	2	0	2	2	0	0	0	74
-0.2 MP	0	0	0	0	0	0	0	0	0	0	0	2	0	0	0	0	6	22	4	2	2	2	0	0	0	0	0	0	0	40
	0	0	0	0	0	0	0	0	0	0	0	0	0	0	0	4	8	14	4	0	2	0	0	0	0	0	0	0	0	32
	0	0	0	0	0	0	0	0	0	0	0	0	0	0	0	0	10	14	6	4	0	0	0	0	2	0	0	0	0	36
	0	0	0	0	0	0	0	0	0	0	4	2	0	0	2	0	10	12	4	4	0	2	0	0	0	0	0	0	0	40
-0.4 MP	0	0	0	0	0	0	0	0	0	0	0	0	0	0	0	0	0	0	4	0	2	0	0	0	0	0	0	0	0	6
	0	0	0	0	0	0	0	0	0	0	0	0	0	0	0	0	0	0	0	4	0	0	0	0	0	0	0	0	0	4
	0	0	0	0	0	0	0	0	0	0	0	0	0	0	0	0	2	0	0	0	0	0	0	0	0	0	0	0	0	2
	0	0	0	0	0	0	0	0	0	0	0	0	0	0	0	0	0	0	0	4	0	0	0	0	0	0	0	0	0	4
-0.6 MP	0	0	0	0	0	0	0	0	0	0	0	0	0	0	0	0	0	0	0	0	0	0	0	0	0	0	0	0	0	0
	0	0	0	0	0	0	0	0	0	0	0	0	0	0	0	0	0	0	0	0	0	0	0	0	0	0	0	0	0	0
	0	0	0	0	0	0	0	0	0	0	0	0	0	0	0	0	0	0	0	0	0	0	0	0	0	0	0	0	0	0
	0	0	0	0	0	0	0	0	0	0	0	0	0	0	0	0	0	0	0	0	0	0	0	0	0	0	0	0	0	0
